# Supplementary material for: Cloud Masks Derived from the Mars Daily Global Maps and an Application to the Tropical Cloud Belt on Mars
Source: MDPI journal article supplement (doi:10.3390/geosciences11080324), 2021-07-31
Supplement: s1 [file s1]

Archive with 1 entries (1 files):
- geosciences-1307071-supplementary.pdf
